# Supplementary material
Source: PubMed Central journal article supplement (PMC2590688)
Supplement: M802318200_1.pdf [file M802318200_1.pdf]

# Fig. 1 supplementary

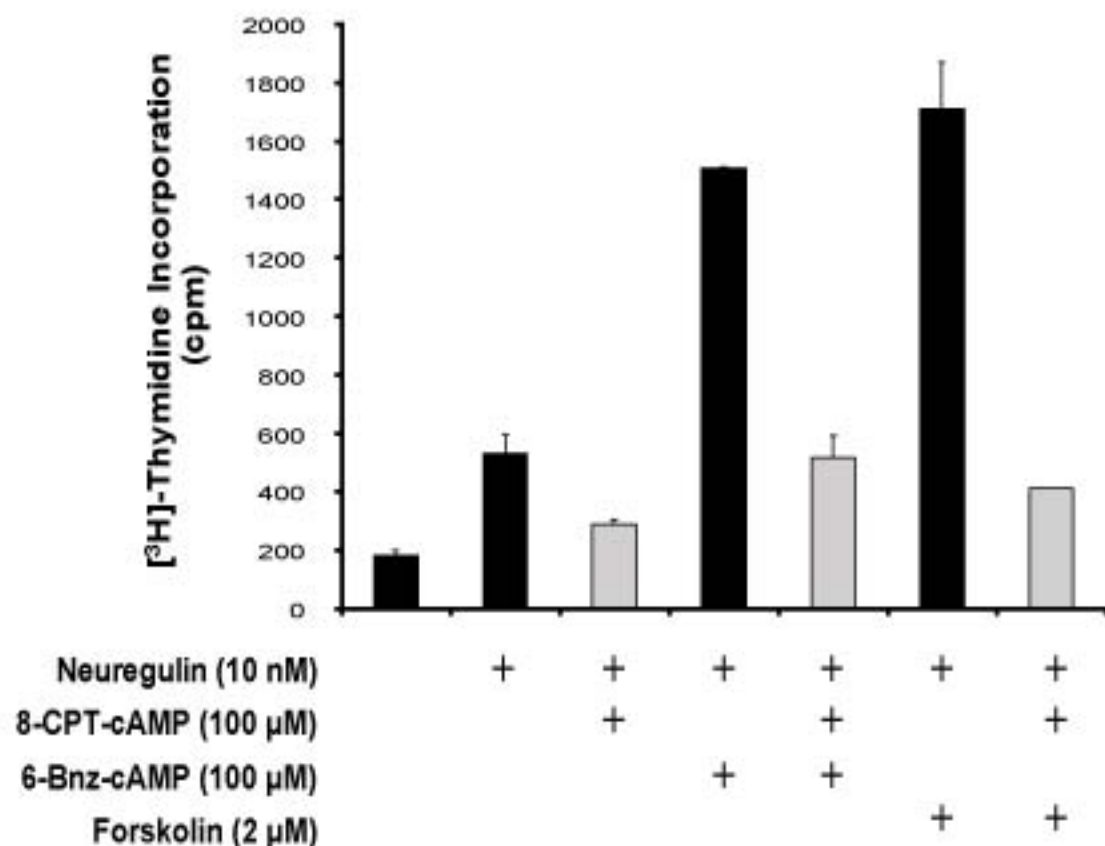

Fig. 1 (supplementary): Inhibitory effect of the EPAC-selective analog, 8-CPT-cAMP, on the synergistic action of forskolin and 6-Bnz-cAMP on neuregulin-induced S-phase entry. Mitogen-deprived human SCs were stimulated as indicated in the figure and allowed to incorporate 3[H]-thymidine for 48 h (Methods). Experimental conditions were identical to those described for other figures of the manuscript.
